# Supplementary material for: Neurofilament light protein in CSF and blood is associated with neurodegeneration and disease severity in Huntington’s disease R6/2 mice
Source: PubMed Central journal article supplement (PMC5658344; doi:10.1038/s41598-017-14179-1), 2017-10-26
Supplement: 41598_2017_14179_MOESM1_ESM.pdf [file 41598_2017_14179_MOESM1_ESM.pdf]

**Neurofilament light protein in CSF and blood is associated with neurodegeneration and disease severity in Huntington's disease R6/2 mice**

Rana Soylu-Kucharz<sup>1</sup>, Åsa Sandelius<sup>2</sup>, Marie Sjögren<sup>1</sup>, Kaj Blennow<sup>2,3</sup>, Edward Wild<sup>4</sup>, Henrik Zetterberg<sup>2,3,4,5</sup>, Maria Björkqvist<sup>1</sup>

<sup>1</sup>Wallenberg Neuroscience Center, Department of Experimental Medical Sciences, Brain Disease Biomarker Unit, Lund University, Lund, Sweden

<sup>2</sup>Institute of Neuroscience and Physiology, Department of Psychiatry and Neurochemistry, The Sahlgrenska Academy at University of Gothenburg, Mölndal, Sweden

<sup>3</sup>Clinical Neurochemistry Laboratory, Sahlgrenska University Hospital, Mölndal, Sweden

<sup>4</sup>UCL Institute of Neurology, Queen Square, London, UK

<sup>5</sup>UK Dementia Research Institute, London, UK

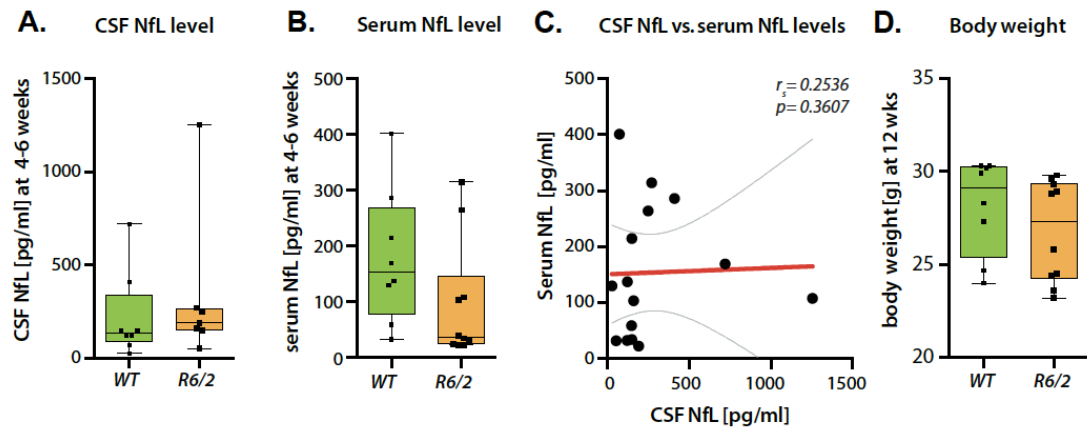

**Supplemental Figure 1: No difference in CSF and serum NfL levels between R6/2 and WT mice at 6 weeks.** (A) CSF (Mann-Whitney test,  $p=0.212$ ,  $n=7-8$ /per group) and (B) serum NfL concentrations (Mann-Whitney test,  $p=0.068$ ,  $n=8-10$ /per group) in R6/2 and WT littermates. (C) There was no correlation between CSF and serum NfL levels ( $p=0.3607$ ). (D) R6/2 mice exhibit similar body weight compared to WT mice (Mann-Whitney test,  $p=0.167$ ,  $n=7-8$ /per group).  $r_s$ =Spearman's correlation coefficient. Data in A-B and D-E are represented as box plots, with boxes representing 25–75 percentile, horizontal lines are median, and whiskers extend to minimum to maximum values.

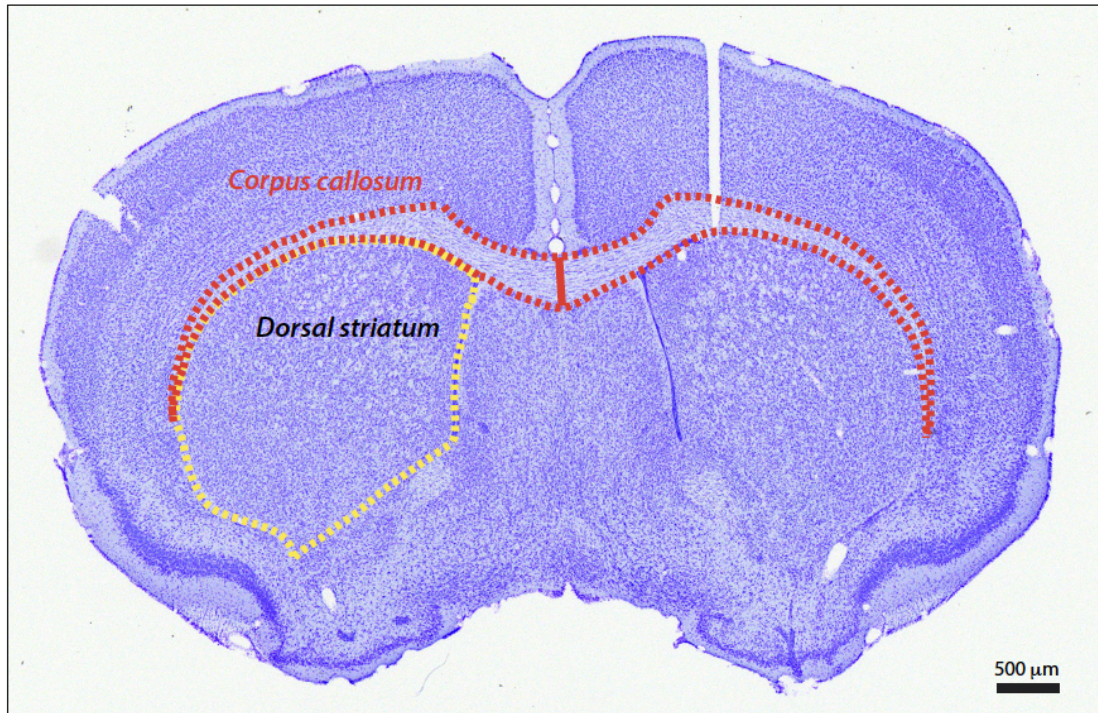

**Supplemental Figure 2:** A coronal section of cresyl violet-stained mouse brain with yellow and red trace denoting the boundaries of brain areas used for dorsal striatum and corpus callosum thickness measurements, respectively.
